# Supplementary material for: Direct chromosome-length haplotyping by single-cell sequencing
Source: HighWire-hosted journal article supplement (doi:10.1101/gr.209841.116), 2016-09-19
Supplement: Supplemental_Table_S4.xlsx [file Supplemental_Table_S4.xlsx]

## Sheet: Sheet1
Supplemental Table S4. List of phased germline de novo mutations of the child
Chromosome	Position	Reference allele	Mutated allele	Haplotype1	Haplotype2	Parental origin mutated allele		Legend
chr1	75656931	T	C	T	C	F		F – Father
chr1	110384858	G	A	G	A	F		M – mother
chr1	181241381	G	A	G	A	F
chr2	39410125	C	T	NA	T	F
chr2	152607278	T	C	NA	C	F
chr2	182401522	C	T	C	T	F
chr3	102937435	C	T	T	C	M
chr3	120382721	G	A	G	A	F
chr4	14836617	C	T	NA	NA	NA
chr4	104844267	C	G	C	G	F
chr5	6519106	C	T	T	C	F
chr5	52673983	A	G	A	G	M
chr5	126413823	G	T	NA	NA	NA
chr5	145087440	G	A	A	G	F
chr6	52228802	T	A	T	A	F
chr6	145850003	T	C	T	C	F
chr6	160254950	T	C	NA	C	F
chr8	21612635	G	A	G	A	F
chr8	74842661	G	C	NA	C	F
chr9	38086405	C	A	A	C	F
chr9	88965449	A	G	NA	A	F
chr9	122390419	G	A	NA	NA	NA
chr10	55926299	G	T	T	NA	F
chr10	55926300	A	T	T	NA	F
chr10	120315437	C	T	T	C	F
chr11	40808201	T	C	C	NA	F
chr11	75729199	T	C	C	T	F
chr11	85308859	T	C	C	T	F
chr11	116769836	A	G	G	A	F
chr14	55833106	C	T	NA	C	F
chr14	77878937	T	A	A	T	F
chr15	48741257	A	C	NA	A	F
chr15	49035853	C	T	C	T	M
chr15	56457066	T	C	C	NA	F
chr15	83516565	C	T	NA	NA	NA
chr15	85592923	T	C	NA	T	M
chr15	96993499	A	G	NA	NA	NA
chr16	29508587	T	A	NA	T	F
chr16	81098005	G	A	A	G	F
chr17	50857800	G	A	G	A	F
chr17	68887438	C	A	C	NA	F
chr17	78305944	G	A	G	A	F
chr18	72246575	G	A	A	G	F
chr19	6612912	C	T	NA	C	F
chr20	7143809	T	G	NA	NA	NA
chr20	54789955	G	A	A	G	F
chr21	19087225	G	C	C	G	F
chr22	22592476	T	A	NA	NA	NA
chr23	8558739	T	C	T	C	M
