# Supplementary material for: Direct chromosome-length haplotyping by single-cell sequencing
Source: HighWire-hosted journal article supplement (doi:10.1101/gr.209841.116), 2016-09-19
Supplement: Supplemental_Table_S5.xlsx [file Supplemental_Table_S5.xlsx]

## Sheet: Sheet1
Supplemental Table S5. Coordinates of mapped meiotic recombination events
FATHER'S HOMOLOGUE RECOMBINATION BREAKPOINTS					MOTHER'S HOMOLOGUE RECOMBINATION BREAKPOINTS
Chr	Start	End	Range		Chr	Start	End	Range
chr1	56570569	56590792	20223		chr1	34027288	34030058	2770
chr1	219217015	219218429	1414		chr1	161154043	161157718	3675
chr2	77219995	77248040	28045		chr1	243762933	243771792	8859
chr2	129158797	129196410	37613		chr2	139218623	139221406	2783
chr2	220666151	220669672	3521		chr2	192603816	192773654	169838
chr3	162617248	162627112	9864		chr3	31822981	31838437	15456
chr4	21260780	21300328	39548		chr3	120581739	120590200	8461
chr4	115511931	115534577	22646		chr4	2733701	2739505	5804
chr4	168561203	168563808	2605		chr4	36331484	36361397	29913
chr5	9670512	9788819	118307		chr4	77943789	77958626	14837
chr5	126645368	126655997	10629		chr4	115082979	115091179	8200
chr5	171656344	171814443	158099		chr5	125786272	125817763	31491
chr8	3561510	3564514	3004		chr5	172122929	172127478	4549
chr9	135798873	135817231	18358		chr6	42843266	42862503	19237
chr10	17101118	17111972	10854		chr7	7533656	7636998	103342
chr11	103446029	103465197	19168		chr7	30968800	30970486	1686
chr12	68548955	68555833	6878		chr8	68599025	68609157	10132
chr12	126367833	126368241	408		chr8	93957795	94256563	298768
chr14	93941051	93966104	25053		chr9	69240841	70218647	977806
chr16	61126694	61129184	2490		chr9	104991258	105050746	59488
chr17	72595877	72608452	12575		chr10	6657940	6671873	13933
chr18	4585501	4597279	11778		chr10	75447150	75917994	470844
chr18	72226863	72375855	148992		chr10	105691996	105745764	53768
chr20	51115138	51135407	20269		chr11	9733143	9740635	7492
chr21	41299585	41348564	48979		chr11	95318498	95371021	52523
chr22	33310134	33316400	6266		chr12	50060962	50074086	13124
					chr12	93637140	93647069	9929
					chr13	19767121	19778706	11585
					chr13	100171057	100192727	21670
					chr14	92079466	92084724	5258
					chr15	91801359	91846998	45639
					chr16	66989178	66990546	1368
					chr17	67826167	67830461	4294
					chr18	6830063	6866655	36592
					chr20	6913839	6951218	37379
					chr20	55029082	55039239	10157
					chrX	13472100	13498213	26113
					chrX	138418259	138577695	159436
