# Supplementary material for: Direct chromosome-length haplotyping by single-cell sequencing
Source: HighWire-hosted journal article supplement (doi:10.1101/gr.209841.116), 2016-09-19
Supplement: Supplemental_Table_S6.xlsx [file Supplemental_Table_S6.xlsx]

## Sheet: Sheet1
Supplemental Table S6. Coordinates of short switch events						Legend
Chromosome	Start	End	Width	ID		F - Father's homologue
chr1	164523881	164546868	22988	F		M – Mother's homologue
chr2	69051111	69051151	41	F
chr2	136844593	136844671	79	F
chr3	139849021	140083948	234928	F
chr6	57321934	57344602	22669	F
chr7	25265076	25270343	5268	F
chr8	70236885	70236931	47	F
chr8	122309473	122319017	9545	F
chr10	109640471	109640545	75	F
chr13	63753240	63753357	118	F
chr19	32543547	32543599	53	F
chr1	187548561	187550331	1771	M
chr2	21463388	21463403	16	M
chr2	224941037	224942584	1548	M
chr6	57361776	57436486	4257	M
chr10	126046196	126284229	238034	M
chr15	62745340	63348567	603228	M
chr18	45259808	45430791	170984	M
