# Supplementary material for: Direct chromosome-length haplotyping by single-cell sequencing
Source: HighWire-hosted journal article supplement (doi:10.1101/gr.209841.116), 2016-09-19
Supplement: Supplemental_Table_S7.xlsx [file Supplemental_Table_S7.xlsx]

## Sheet: Sheet1
Supplemental Table S7. Comparison of phased deletions between Strand-seq and Fan et al. (2011)
Fan et al. Phasing
HapMapIII_CNP_ID	chr	start	end	size	12878	12891	12892	12878_paternal	12878_maternal	12891_H1	12891_H2	12892_H1	12892_H2
HM3_CNP_44	1	188038628	188043864	5236	1	2	1								Legend
HM3_CNP_156	3	65163493	65189725	26232	1	1	2								*At least one homolog did not contain any typed markers.
HM3_CNP_232	4	87195118	87198968	3850	1	1	2								The homolog carrying a copy of the region is highlighted in gray.
HM3_CNP_259	4	161271979	161291569	19590	1	1	2								Read counts in each homologue are normalized per 1kb (read_count/deletion_size)*1000
HM3_CNP_251	4	153010030	153012241	2211	2	2	1								Green rectangles in both tables highlights the complete concordance of phased deletions between Strand-seq and Fan et al.
HM3_CNP_351	6	55934096	55954486	20390	1	1	2								Red rectangles in both tables highlights small discordances between datasets caused by missing markers in Fan et al.
HM3_CNP_354	6	67065532	67105350	39818	1	2	1
HM3_CNP_389	7	12988634	12994810	6176	1	1	2						*
HM3_CNP_506	9	6691130	6698357	7227	2	1	1					*	*
HM3_CNP_652	12	127796462	127798498	2036	2	1	2
HM3_CNP_768	17	51515464	51527822	12358	2	1	2
HM3_CNP_827	20	52081215	52092058	10843	1	1	2					*
HM3_CNP_71	2	14622400	14627543	5143	1	1	2
HM3_CNP_116	2	183793698	183798067	4369	1	1	2
HM3_CNP_201	4	9819751	9844366	24615	1	1	0
HM3_CNP_309	5	137835860	137844856	8996	1	1	2
HM3_CNP_371	6	132751050	132754736	3686	1	1	2
HM3_CNP_593	11	55124465	55209585	85120	1	1	2
HM3_CNP_708	14	73311441	73315360	3919	1	1	2
Strand-seq Phasing
HapMapIII_CNP_ID	chr	start	end	size	12878	12891	12892	12878_paternal	12878_maternal	12891_H1	12891_H2	12892_H1	12892_H2
HM3_CNP_44	1	188038628	188043864	5236	1	2	1	8.21238	0	15.2788	12.987	7.44843	0
HM3_CNP_156	3	65163493	65189725	26232	1	1	2	0.26685	15.1723	0.571821	24.4358	16.964	15.5916
HM3_CNP_232	4	87195118	87198968	3850	1	1	2	1.03896	13.5065	20	3.8961	12.987	16.6234
HM3_CNP_259	4	161271979	161291569	19590	1	1	2	0.306279	7.70801	0.510465	12.8637	9.49464	9.74987
HM3_CNP_251	4	153010030	153012241	2211	2	2	1	26.6848	26.6848	37.0873	24.8756	21.2573	0.452284
HM3_CNP_351	6	55934096	55954486	20390	1	1	2	0.0490436	7.40559	0	13.8303	9.46542	8.97499
HM3_CNP_354	6	67065532	67105350	39818	1	2	1	5.39957	0.0502285	12.4567	12.2809	6.73062	0.0753428
HM3_CNP_389	7	12988634	12994810	6176	1	1	2	0	15.2202	28.0117	0.323834	11.9819	12.4676
HM3_CNP_506	9	6691130	6698357	7227	2	1	1	19.9253	22.0008	20.0637	0.27674	0.96859	12.8684
HM3_CNP_652	12	127796462	127798498	2036	2	1	2	27.0138	21.611	0.982318	23.0845	17.1906	13.2613
HM3_CNP_768	17	51515464	51527822	12358	2	1	2	20.8772	16.993	24.4376	0.485515	12.6234	14.4036
HM3_CNP_827	20	52081215	52092058	10843	1	1	2	0	11.067	18.7218	0	11.9893	11.6204
HM3_CNP_71	2	14622400	14627543	5143	1	1	2	0	22.7494	25.8604	0	21.7772	20.2217
HM3_CNP_116	2	183793698	183798067	4369	1	1	2	0	6.86656	12.8176	0	10.5287	9.61318
HM3_CNP_201	4	9819751	9844366	24615	1	1	0	28.6817	1.62503	34.1662	1.86878	1.21877	0.975015
HM3_CNP_309	5	137835860	137844856	8996	1	1	2	0.444642	11.4495	0.222321	20.1201	14.4509	16.1183
HM3_CNP_371	6	132751050	132754736	3686	1	1	2	2.44167	11.9371	4.06945	22.5176	11.1232	9.76668
HM3_CNP_593	11	55124465	55209585	85120	1	1	2	0.0822368	12.218	16.8468	0.093985	10.867	11.6306
HM3_CNP_708	14	73311441	73315360	3919	1	1	2	0	23.7305	22.7099	0	14.0342	14.5445
