# Supplementary material for: Direct chromosome-length haplotyping by single-cell sequencing
Source: HighWire-hosted journal article supplement (doi:10.1101/gr.209841.116), 2016-09-19
Supplement: Supplemental_Table_S8.xlsx [file Supplemental_Table_S8.xlsx]

## Sheet: Sheet1
Supplemental Table S8. Phased deletions >1000 kb from 1000 Genomes project
chr	start	end	size	reads_C_mother	reads_C_father	reads_F1	reads_F2	reads_M1	reads_M2	Phase_1000g	C_Mother	C_Father	F1	F2	M1	M2	Match_1000G_phase
1	7492661	7494108	1447	30	0	47	3	40	41	1|0	w	d	w	d	w	w	YES		C_mother: homologs inherited from the mother
1	9517947	9520456	2509	14	1	28	4	2	20	1|0	w	d	w	d	d	w	YES		C_father: homologs inherited from the mother
1	10405086	10406377	1291	0	34	37	41	20	1	0|1	d	w	w	w	w	d	YES		F1: Father's homolog 1
1	16024269	16028219	3950	34	3	8	3	38	36	1|0	w	d	d	d	w	w	YES		F2: Father's homolog 2
1	31347521	31349786	2265	32	2	35	0	22	23	1|0	w	d	w	d	w	w	YES		M1: Mother's homolog 1
1	34874014	34884572	10558	3	230	297	294	1	210	0|1	d	w	w	w	d	w	YES		M2: Mother's homolog 2
1	39770833	39773875	3042	0	25	19	38	0	24	0|1	d	w	w	w	d	w	YES		w: wild type
1	53366763	53368186	1423	4	30	34	23	2	8	0|1	d	w	w	w	d	d	YES		d: deletion
1	78421745	78426736	4991	0	62	72	71	0	47	0|1	d	w	w	w	d	w	YES		?: Positions where reliable call cannot be make
1	79994369	79995620	1251	14	0	0	20	21	0	1|0	w	d	d	w	w	d	YES
1	89248518	89251201	2683	0	62	62	85	0	1	0|1	d	w	w	w	d	d	YES
1	92004639	92005919	1280	1	31	47	43	1	1	0|1	d	w	w	w	d	d	YES
1	108204495	108207022	2527	44	0	2	45	42	2	1|0	w	d	d	w	w	d	YES
1	110026542	110046803	20261	233	12	0	4	188	10	1|0	w	d	d	d	w	d	YES
1	116030991	116034362	3371	41	1	6	41	31	46	1|0	w	d	d	w	w	w	YES
1	143179447	143191980	12533	18	0	2	23	25	0	0|1	w	d	d	w	w	d	NO
1	150822119	150853556	31437	523	12	1	5	437	409	1|0	w	d	d	d	w	w	YES
1	157227977	157232832	4855	79	1	3	130	63	56	1|0	w	d	d	w	w	w	YES
1	179016388	179022037	5649	47	1	0	73	52	48	1|0	w	d	d	w	w	w	YES
1	183276429	183278361	1932	20	0	0	48	18	13	1|0	w	d	d	w	w	w	YES
1	185731370	185733452	2082	1	12	29	2	3	6	0|1	d	w	w	d	d	d	YES
1	187971100	188049979	78879	7	590	1249	1127	579	5	0|1	d	w	w	w	w	d	YES
1	188038069	188044377	6308	0	68	98	80	48	0	1|0	d	w	w	w	w	d	NO
1	220440792	220447154	6362	120	0	155	0	4	67	1|0	w	d	w	d	d	w	YES
1	233603700	233604968	1268	1	17	20	14	6	0	0|1	d	w	w	w	w	d	YES
2	3710677	3715899	5222	0	76	121	106	84	4	0|1	d	w	w	w	w	d	YES
2	4189985	4201508	11523	23	185	306	309	183	8	0|1	d	w	w	w	w	d	YES
2	14621616	14627611	5995	138	1	161	5	129	124	1|0	w	d	w	d	w	w	YES
2	14623887	14627406	3519	84	0	104	0	88	82	1|0	w	d	w	d	w	w	YES
2	18769639	18770822	1183	26	20	59	34	27	15	0|1	?	?	?	?	?	?	?
2	22541904	22543612	1708	21	3	47	6	28	33	1|0	w	d	w	d	w	w	YES
2	33077966	33080800	2834	0	96	82	100	0	0	0|1	d	w	w	w	d	d	YES
2	34377080	34379173	2093	27	0	0	2	27	27	1|0	w	d	d	d	w	w	YES
2	41826531	41829545	3014	19	9	10	6	3	10	1|0	?	?	?	?	?	?	?
2	59476760	59484575	7815	64	2	126	0	80	63	1|0	w	d	w	d	w	w	YES
2	66359072	66361047	1975	24	0	42	0	0	28	1|0	w	d	w	d	d	w	YES
2	101598970	101599996	1026	0	11	20	24	19	1	0|1	d	w	w	w	w	d	YES
2	106061231	106062467	1236	7	16	26	29	3	2	0|1	?	?	?	?	?	?	?
2	109056413	109061769	5356	0	43	99	84	0	0	1|0	d	w	w	w	d	d	NO
2	123193759	123199015	5256	105	0	0	96	61	90	1|0	w	d	d	w	w	w	YES
2	126159717	126168301	8584	0	57	174	0	102	2	0|1	d	w	w	d	w	d	YES
2	129354858	129362670	7812	62	1	109	0	0	78	1|0	w	d	w	d	d	w	YES
2	129958589	129968045	9456	150	4	181	9	169	137	1|0	w	d	w	d	w	w	YES
2	129959938	129965987	6049	95	0	133	6	103	92	1|0	w	d	w	d	w	w	YES
2	133388382	133391006	2624	37	3	58	2	30	57	1|0	w	d	w	d	w	w	YES
2	150739373	150746531	7158	1	81	126	121	0	94	0|1	d	w	w	w	d	w	YES
2	155527184	155541408	14224	150	23	226	31	128	131	1|0	w	d	w	d	w	w	YES
2	176973885	176980286	6401	0	98	129	109	0	0	0|1	d	w	w	w	d	d	YES
2	179773528	179790264	16736	252	4	301	9	214	209	1|0	w	d	w	d	w	w	YES
2	183793760	183799230	5470	50	2	72	0	57	66	1|0	w	d	w	d	w	w	YES
2	203889775	203899876	10101	2	73	118	138	80	5	0|1	d	w	w	w	w	d	YES
2	208059346	208067558	8212	0	117	4	139	131	3	0|1	d	w	d	w	w	d	YES
2	209651216	209657172	5956	1	101	159	147	78	5	0|1	d	w	w	w	w	d	YES
2	215437007	215439077	2070	0	47	1	65	53	1	0|1	d	w	d	w	w	d	YES
3	6625202	6629630	4428	51	0	1	65	44	40	1|0	w	d	d	w	w	w	YES
3	8300606	8301807	1201	1	30	34	2	16	2	0|1	d	w	w	d	w	d	YES
3	11083255	11086870	3615	35	0	2	59	46	56	1|0	w	d	d	w	w	w	YES
3	16214414	16216217	1803	3	48	63	95	2	0	0|1	d	w	w	w	d	d	YES
3	21698726	21700958	2232	2	36	65	74	33	0	0|1	d	w	w	w	w	d	YES
3	32077054	32082891	5837	6	74	165	2	0	0	0|1	d	w	w	d	d	d	YES
3	47465673	47468448	2775	0	42	36	46	0	37	0|1	d	w	w	w	d	w	YES
3	65163866	65189763	25897	399	4	10	635	446	404	1|0	w	d	d	w	w	w	YES
3	68717430	68722944	5514	111	0	5	121	89	80	1|0	w	d	d	w	w	w	YES
3	68822345	68830569	8224	102	1	5	5	95	1	1|0	w	d	d	d	w	d	YES
3	75666014	75673286	7272	125	3	8	8	112	4	1|0	w	d	d	d	w	d	YES
3	100426494	100432206	5712	52	1	4	117	92	97	1|0	w	d	d	w	w	w	YES
3	112726283	112731545	5262	105	8	5	4	116	125	1|0	w	d	d	d	w	w	YES
3	133190942	133196074	5132	85	0	0	2	58	71	1|0	w	d	d	d	w	w	YES
3	137503614	137509016	5402	3	48	66	69	42	5	0|1	d	w	w	w	w	d	YES
3	157574856	157576382	1526	20	0	1	40	23	30	1|0	w	d	d	w	w	w	YES
3	159833413	159834604	1191	12	0	2	38	22	28	1|0	w	d	d	w	w	w	YES
3	160944029	160946157	2128	4	23	56	53	27	0	0|1	d	w	w	w	w	d	YES
3	163994896	164008527	13631	118	0	0	0	1	142	1|0	w	d	d	d	d	w	YES
3	163997165	164108341	111176	665	60	5	0	58	763	1|0	w	d	d	d	d	w	YES
3	164041552	164084246	42694	368	1	3	0	1	407	1|0	w	d	d	d	d	w	YES
3	178777169	178780183	3014	6	48	112	89	57	3	0|1	d	w	w	w	w	d	YES
3	178864030	178868141	4111	0	43	91	88	44	3	0|1	d	w	w	w	w	d	YES
3	189215572	189217543	1971	0	21	29	41	26	3	0|1	d	w	w	w	w	d	YES
3	191219869	191223342	3473	34	1	1	2	4	48	1|0	w	d	d	d	d	w	YES
3	194358023	194368099	10076	125	0	1	0	1	166	1|0	w	d	d	d	d	w	YES
3	198418960	198423650	4690	36	0	74	1	37	31	1|0	w	d	w	d	w	w	YES
4	4181978	4183108	1130	0	25	31	34	0	0	0|1	d	w	w	w	d	d	YES
4	4190879	4200518	9639	17	198	217	189	18	23	0|1	d	w	w	w	d	d	YES
4	6945670	6946896	1226	2	22	13	24	8	3	0|1	?	?	?	?	?	?	?
4	6948252	6951302	3050	57	0	0	50	0	33	1|0	w	d	d	w	d	w	YES
4	9820321	9843678	23357	5	684	818	8	2	1	0|1	d	w	w	d	d	d	YES
4	61012697	61015783	3086	1	45	1	55	1	28	0|1	d	w	d	w	d	w	YES
4	61621784	61624838	3054	45	0	48	0	25	0	1|0	w	d	w	d	w	d	YES
4	70157570	70266335	108765	44	1204	52	1466	57	1117	0|1	d	w	d	w	d	w	YES
4	87195399	87198981	3582	50	0	70	0	45	56	1|0	w	d	w	d	w	w	YES
4	92150579	92154861	4282	95	1	98	1	60	69	1|0	w	d	w	d	w	w	YES
4	92150689	92152561	1872	69	0	53	0	35	37	1|0	w	d	w	d	w	w	YES
4	92152872	92155120	2248	20	1	44	2	20	30	1|0	w	d	w	d	w	w	YES
4	107823747	107828741	4994	88	7	110	0	76	82	1|0	w	d	w	d	w	w	YES
4	116148175	116151329	3154	62	1	2	1	32	24	1|0	w	d	d	d	w	w	YES
4	116386220	116396733	10513	1	74	86	108	6	75	0|1	d	w	w	w	d	w	YES
4	130285639	130287885	2246	46	0	0	54	33	22	1|0	w	d	d	w	w	w	YES
4	133400235	133402429	2194	2	24	37	41	1	0	0|1	d	w	w	w	d	d	YES
4	145535904	145539350	3446	2	8	15	33	2	0	0|1	?	?	?	?	?	?	?
4	161246243	161299984	53741	673	423	441	864	634	570	1|0	?	?	?	?	?	?	?
4	161265182	161293099	27917	259	8	14	433	296	290	1|0	w	d	d	w	w	w	YES
4	168129044	168130187	1143	10	1	0	44	18	22	1|0	w	d	d	w	w	w	YES
4	171513123	171514267	1144	1	24	3	16	5	10	0|1	?	?	?	?	?	?	?
4	173225206	173229508	4302	1	61	94	117	4	2	0|1	d	w	w	w	d	d	YES
4	187330481	187335246	4765	69	0	2	0	57	2	1|0	w	d	d	d	w	d	YES
5	12864023	12873529	9506	0	44	0	0	68	66	1|0	w	d	d	d	w	w	YES
5	19411006	19412150	1144	10	1	22	18	14	0	0|1	d	w	w	w	w	d	YES
5	26832510	26837658	5148	2	12	33	0	31	23	1|0	w	d	w	d	w	w	YES
5	27560626	27562197	1571	1	15	2	8	30	22	1|0	w	d	d	d	w	w	YES
5	60037453	60039433	1980	0	31	2	2	1	18	1|0	w	d	d	d	d	w	YES
5	63734099	63737115	3016	21	2	44	46	25	0	0|1	d	w	w	w	w	d	YES
5	65063825	65066127	2302	22	0	22	21	17	0	0|1	d	w	w	w	w	d	YES
5	78145552	78147623	2071	0	32	46	1	26	45	1|0	w	d	w	d	w	w	YES
5	86151086	86153619	2533	18	1	28	26	0	0	0|1	d	w	w	w	d	d	YES
5	86281764	86282902	1138	22	0	1	26	27	2	0|1	d	w	d	w	w	d	YES
5	97427314	97428515	1201	25	5	23	40	2	2	0|1	d	w	w	w	d	d	YES
5	104463841	104471041	7200	46	0	75	82	72	0	0|1	d	w	w	w	w	d	YES
5	104508143	104525481	17338	111	0	201	213	134	0	0|1	d	w	w	w	w	d	YES
5	106264783	106267571	2788	0	10	32	0	23	15	1|0	w	d	w	d	w	w	YES
5	117415006	117421790	6784	56	0	101	86	69	2	0|1	d	w	w	w	w	d	YES
5	137835254	137844968	9714	4	105	5	188	133	146	1|0	w	d	d	w	w	w	YES
5	170062420	170063960	1540	12	0	26	1	0	17	0|1	d	w	w	d	d	w	YES
5	178041670	178046022	4352	66	0	97	98	0	0	0|1	d	w	w	w	d	d	YES
5	179779940	179781165	1225	14	1	0	29	8	0	0|1	d	w	d	w	w	d	YES
6	13990528	13991831	1303	2	34	40	2	1	23	0|1	d	w	w	d	d	w	YES
6	29951501	29957169	5668	74	2	3	118	74	3	1|0	w	d	d	w	w	d	YES
6	31383955	31387125	3170	0	50	52	66	0	47	0|1	d	w	w	w	d	w	YES
6	32731511	32732582	1071	6	0	0	27	12	8	1|0	?	?	?	?	?	?	?
6	33691058	33693962	2904	16	2	4	37	20	33	1|0	w	d	d	w	w	w	YES
6	34045711	34051190	5479	47	6	8	87	53	51	1|0	w	d	d	w	w	w	YES
6	49038326	49046267	7941	34	4	5	92	80	56	1|0	w	d	d	w	w	w	YES
6	55933883	55954675	20792	151	1	0	284	196	183	1|0	w	d	d	w	w	w	YES
6	55951152	55954396	3244	21	0	0	46	37	25	1|0	w	d	d	w	w	w	YES
6	57730915	57735924	5009	42	0	2	78	33	36	1|0	w	d	d	w	w	w	YES
6	58531708	58536839	5131	33	3	2	78	49	26	1|0	w	d	d	w	w	w	YES
6	66455994	66461336	5342	33	0	0	99	56	50	1|0	w	d	d	w	w	w	YES
6	67065949	67105754	39805	2	213	495	479	267	3	0|1	d	w	w	w	w	d	YES
6	67081677	67084006	2329	0	22	54	41	24	0	0|1	d	w	w	w	w	d	YES
6	72920312	72930384	10072	2	120	173	10	97	5	0|1	d	w	w	d	w	d	YES
6	77154184	77159363	5179	38	1	0	1	46	63	1|0	w	d	d	d	w	w	YES
6	102041254	102045721	4467	37	0	0	86	48	39	1|0	w	d	d	w	w	w	YES
6	103844234	103869987	25753	191	4	5	444	2	205	1|0	w	d	d	w	d	w	YES
6	105367520	105370449	2929	0	20	33	1	33	1	0|1	d	w	w	d	w	d	YES
6	119118938	119120618	1680	20	20	32	21	11	20	0|1	?	?	?	?	?	?	?
6	128869420	128871298	1878	25	0	3	52	20	22	1|0	w	d	d	w	w	w	YES
6	132148283	132150505	2222	6	42	57	52	41	5	0|1	d	w	w	w	w	d	YES
6	132155924	132160252	4328	1	47	90	106	35	1	0|1	d	w	w	w	w	d	YES
6	132416884	132420687	3803	3	46	59	74	48	1	0|1	d	w	w	w	w	d	YES
6	132749158	132754132	4974	56	0	5	91	51	59	1|0	w	d	d	w	w	w	YES
7	1822527	1830123	7596	112	5	131	5	47	48	1|0	w	d	w	d	w	w	YES
7	10470756	10472765	2009	1	8	12	22	6	4	0|1	?	?	?	?	?	?	?
7	12988575	12995129	6554	96	2	181	2	81	78	1|0	w	d	w	d	w	w	YES
7	24004696	24006588	1892	0	22	1	49	25	0	0|1	d	w	d	w	w	d	YES
7	29654976	29656669	1693	2	39	37	19	29	0	0|1	d	w	w	w	w	d	YES
7	31556791	31558520	1729	1	19	31	34	0	18	0|1	d	w	w	w	d	w	YES
7	32741464	32744202	2738	0	21	30	25	0	18	0|1	d	w	w	w	d	w	YES
7	39786621	39791729	5108	68	0	83	0	44	58	1|0	w	d	w	d	w	w	YES
7	56729474	56737445	7971	66	1	120	5	73	97	1|0	w	d	w	d	w	w	YES
7	71908199	71913782	5583	3	74	73	81	1	56	0|1	d	w	w	w	d	w	YES
7	82888111	82889137	1026	0	10	16	13	0	12	0|1	d	w	w	w	d	w	YES
7	89648346	89650538	2192	1	26	0	44	1	23	0|1	d	w	d	w	d	w	YES
7	91052047	91058870	6823	0	70	92	90	3	52	0|1	d	w	w	w	d	w	YES
7	96381222	96384525	3303	0	28	55	71	0	47	0|1	d	w	w	w	d	w	YES
7	97233225	97240577	7352	3	75	147	126	1	89	0|1	d	w	w	w	d	w	YES
7	100787973	100792219	4246	31	2	44	3	24	19	1|0	w	d	w	d	w	w	YES
7	109969163	109975668	6505	59	1	131	2	83	106	1|0	w	d	w	d	w	w	YES
7	120077398	120078618	1220	0	33	36	23	0	14	0|1	d	w	w	w	d	w	YES
7	127002203	127005224	3021	5	55	89	87	0	48	0|1	d	w	w	w	d	w	YES
7	141433083	141437236	4153	0	110	173	158	0	102	0|1	d	w	w	w	d	w	YES
7	150861133	150862776	1643	27	0	47	1	29	24	1|0	w	d	w	d	w	w	YES
7	156079847	156087073	7226	116	2	168	0	88	88	1|0	w	d	w	d	w	w	YES
8	25028354	25046867	18513	0	230	4	311	238	0	0|1	d	w	d	w	w	d	YES
8	25122599	25126576	3977	1	68	0	125	2	0	0|1	d	w	d	w	d	d	YES
8	26935339	26936870	1531	0	14	10	25	15	0	0|1	d	w	w	w	w	d	YES
8	30723445	30725065	1620	0	12	33	24	2	0	0|1	d	w	w	w	d	d	YES
8	39314982	39508387	193405	2262	583	674	675	439	2350	1|0	?	?	?	?	?	?	?
8	39351162	39406980	55818	642	10	5	12	2	614	1|0	w	d	d	d	d	w	YES
8	39423130	39427463	4333	114	0	2	2	1	101	1|0	w	d	d	d	d	w	YES
8	39426044	39431188	5144	122	0	2	2	0	94	1|0	w	d	d	d	d	w	YES
8	39430433	39440738	10305	88	0	0	2	0	80	1|0	w	d	d	d	d	w	YES
8	40004842	40009998	5156	80	0	82	4	45	54	1|0	w	d	d	w	w	w	YES
8	94141522	94146368	4846	0	35	58	59	0	0	0|1	d	w	w	w	d	d	YES
8	96944407	96948758	4351	77	0	2	1	87	81	1|0	w	d	d	d	w	w	YES
8	115148492	115149851	1359	0	8	24	12	12	1	0|1	?	?	?	?	?	?	?
8	118942975	118944770	1795	45	2	44	2	22	33	1|0	w	d	w	d	w	w	YES
8	120223715	120230391	6676	87	4	149	3	90	105	1|0	w	d	w	d	w	w	YES
8	127261378	127263751	2373	35	1	2	0	33	45	1|0	w	d	d	d	w	w	YES
8	131919902	131921905	2003	51	0	76	2	0	48	1|0	w	d	w	d	d	w	YES
8	132346839	132349717	2878	0	33	0	52	0	0	0|1	d	w	d	w	d	d	YES
8	144771624	144785839	14215	1	155	4	197	0	1	0|1	d	w	d	w	d	d	YES
9	4366386	4367625	1239	32	1	4	46	22	33	1|0	w	d	d	w	w	w	YES
9	5631637	5632808	1171	0	13	14	23	15	0	0|1	d	w	w	w	w	d	YES
9	15805277	15811947	6670	84	1	3	104	0	42	1|0	w	d	d	w	d	w	YES
9	17899347	17902848	3501	42	2	3	5	33	35	1|0	w	d	d	d	w	w	YES
9	23352812	23367678	14866	1	206	272	308	0	1	0|1	d	w	w	w	d	d	YES
9	23360987	23362431	1444	0	44	33	41	0	0	0|1	d	w	w	w	d	d	YES
9	29082522	29088026	5504	39	0	0	40	20	29	1|0	w	d	d	w	w	w	YES
9	83157735	83160502	2767	39	0	1	0	42	23	1|0	w	d	d	d	w	w	YES
9	95539988	95542858	2870	0	30	26	0	1	27	0|1	d	w	w	d	d	w	YES
9	103754665	103764303	9638	0	237	276	237	0	167	0|1	d	w	w	w	d	w	YES
9	105608107	105609564	1457	13	0	2	28	10	14	1|0	w	d	d	w	w	w	YES
9	131066551	131067957	1406	1	34	49	2	24	0	0|1	d	w	w	d	w	d	YES
9	132070461	132074626	4165	57	1	0	72	1	44	1|0	w	d	d	w	d	w	YES
9	135614988	135616089	1101	42	0	0	3	34	19	1|0	w	d	d	d	w	w	YES
9	137353881	137357424	3543	2	54	3	97	1	0	0|1	d	w	d	w	d	d	YES
9	137618921	137620025	1104	0	32	0	31	2	0	0|1	d	w	d	w	d	d	YES
9	139373348	139375794	2446	0	31	0	45	0	0	0|1	d	w	d	w	d	d	YES
10	5929595	5932813	3218	0	53	7	60	3	1	0|1	d	w	d	w	d	d	YES
10	7117047	7118309	1262	0	36	0	37	33	3	0|1	d	w	d	w	w	d	YES
10	24416844	24418451	1607	0	27	40	3	0	0	0|1	d	w	w	d	d	d	YES
10	27264097	27268174	4077	58	69	90	86	116	45	1|0	?	?	?	?	?	?	?
10	31286754	31291772	5018	45	0	1	0	51	62	1|0	w	d	d	d	w	w	YES
10	31483360	31484874	1514	2	34	44	0	0	0	0|1	d	w	w	d	d	d	YES
10	42021559	42036797	15238	17	106	198	16	19	17	0|1	d	w	w	d	d	d	YES
10	52873699	52884233	10534	0	94	174	172	123	0	0|1	d	w	w	w	w	d	YES
10	58926858	58928106	1248	0	19	26	5	2	1	0|1	d	w	w	d	d	d	YES
10	65179257	65181411	2154	53	1	0	0	48	49	1|0	w	d	d	d	w	w	YES
10	70950923	70961290	10367	15	142	220	213	179	5	0|1	d	w	w	w	w	d	YES
10	72118741	72121349	2608	0	74	73	2	52	0	0|1	d	w	w	d	w	d	YES
10	100678629	100692021	13392	2	167	273	0	0	1	0|1	d	w	w	d	d	d	YES
10	108020294	108022565	2271	2	54	77	3	1	1	0|1	d	w	w	d	d	d	YES
10	132525386	132528404	3018	5	71	89	114	75	6	0|1	d	w	w	w	w	d	YES
10	132878687	132881186	2499	0	21	83	0	0	0	0|1	d	w	w	d	d	d	YES
11	4204841	4309805	104964	306	465	592	722	411	229	0|1	?	?	?	?	?	?	?
11	4220668	4266306	45638	75	143	196	229	142	68	0|1	?	?	?	?	?	?	?
11	4228725	4284087	55362	94	90	185	233	136	73	0|1	?	?	?	?	?	?	?
11	5716662	5718942	2280	0	30	2	36	28	0	0|1	d	w	d	w	w	d	YES
11	22427361	22429426	2065	49	0	53	0	30	31	1|0	w	d	w	d	w	w	YES
11	31350344	31354226	3882	0	46	50	57	0	43	0|1	d	w	w	w	d	w	YES
11	51197750	51219552	21802	2	388	2	2	322	291	1|0	d	w	d	d	w	w	NO
11	51203272	51205558	2286	0	39	0	1	29	31	1|0	d	w	d	d	w	w	NO
11	51434416	51438341	3925	391	375	457	433	484	624	0|1	?	?	?	?	?	?	?
11	55147901	55151692	3791	54	2	68	0	39	69	1|0	w	d	w	d	w	w	YES
11	58350771	58352603	1832	29	0	0	3	19	6	1|0	?	?	?	?	?	?	?
11	66468055	66470128	2073	36	0	2	2	26	22	1|0	w	d	d	d	w	w	YES
11	67398798	67401483	2685	1	21	1	35	4	20	0|1	d	w	d	w	d	w	YES
11	102256312	102258014	1702	19	2	27	0	9	20	1|0	?	?	?	?	?	?	?
11	124280214	124283590	3376	3	95	118	162	84	1	0|1	d	w	w	w	w	d	YES
11	134308722	134310717	1995	48	3	16	46	44	37	1|0	?	?	?	?	?	?	?
12	162433	168240	5807	102	0	132	0	79	43	1|0	w	d	w	d	w	w	YES
12	247680	255033	7353	141	1	160	3	80	96	0|1	w	d	w	d	w	w	NO
12	16311399	16312555	1156	0	8	24	18	0	0	0|1	?	?	?	?	?	?	?
12	36370989	36372791	1802	9	12	14	4	2	38	0|1	?	?	?	?	?	?	?
12	44189474	44196214	6740	111	2	2	0	81	91	1|0	w	d	d	d	w	w	YES
12	46994754	46997285	2531	49	1	64	2	17	2	1|0	w	d	w	d	w	d	YES
12	49502715	49504729	2014	0	24	29	17	2	9	0|1	d	w	w	w	d	d	YES
12	69888630	69890747	2117	11	0	0	33	27	14	1|0	w	d	d	w	w	w	YES
12	89011162	89015839	4677	47	0	0	4	59	52	1|0	w	d	d	d	w	w	YES
12	94534585	94536545	1960	27	2	0	28	17	25	1|0	w	d	d	w	w	w	YES
12	97194061	97196232	2171	41	2	2	29	22	24	1|0	w	d	d	w	w	w	YES
12	97479513	97483163	3650	0	23	53	53	1	22	0|1	d	w	w	w	d	w	YES
12	98318062	98326903	8841	0	88	151	166	0	82	0|1	d	w	w	w	d	w	YES
12	98812468	98815910	3442	32	0	2	62	42	28	1|0	w	d	d	w	w	w	YES
12	100626541	100631246	4705	67	2	0	66	39	33	1|0	w	d	d	w	w	w	YES
13	22530424	22535293	4869	2	35	66	50	0	37	0|1	d	w	w	w	d	w	YES
13	30601504	30603692	2188	58	0	61	3	30	26	1|0	w	d	w	d	w	w	YES
13	37955317	37958204	2887	0	36	0	66	0	42	0|1	d	w	d	w	d	w	YES
13	66072781	66075426	2645	32	0	36	0	23	23	1|0	w	d	w	d	w	w	YES
13	71741032	71744924	3892	1	42	2	59	0	0	0|1	d	w	d	w	d	d	YES
13	82063935	82070207	6272	66	0	106	0	61	52	1|0	w	d	w	d	w	w	YES
13	98052022	98056252	4230	30	2	39	3	38	39	1|0	w	d	w	d	w	w	YES
13	100692136	100694429	2293	0	34	54	33	3	1	0|1	d	w	w	w	d	d	YES
13	113607305	113608384	1079	0	18	0	10	10	14	1|0	d	w	d	w	w	w	NO
14	23507764	23544727	36963	62	358	368	394	251	42	0|1	d	w	w	w	w	d	YES
14	59411151	59412997	1846	17	0	26	0	18	16	1|0	w	d	w	d	w	w	YES
14	64676106	64677776	1670	0	40	4	34	21	1	0|1	d	w	d	w	w	d	YES
14	69757582	69759215	1633	31	0	47	0	19	28	1|0	w	d	w	d	w	w	YES
14	73066948	73094356	27408	295	4	949	9	10	206	1|0	w	d	w	d	d	w	YES
14	73309556	73316701	7145	135	4	133	2	78	93	1|0	w	d	w	d	w	w	YES
14	79176025	79184811	8786	106	4	158	3	133	114	1|0	w	d	w	d	w	w	YES
15	69495668	69500739	5071	2	40	81	78	0	0	0|1	d	w	w	w	d	d	YES
15	80352834	80354931	2097	0	12	34	27	10	3	0|1	?	?	?	?	?	?	?
15	82332438	82334842	2404	2	38	55	52	0	0	0|1	d	w	w	w	d	d	YES
15	83858011	83860206	2195	27	0	0	0	32	38	1|0	w	d	d	d	w	w	YES
15	96659835	96661331	1496	45	2	1	62	34	33	1|0	w	d	d	w	w	w	YES
15	97392029	97393156	1127	27	0	0	0	24	25	1|0	w	d	d	d	w	w	YES
16	938833	940719	1886	14	44	10	25	6	15	0|1	?	?	?	?	?	?	?
16	11591233	11592792	1559	14	0	19	1	7	14	1|0	?	?	?	?	?	?	?
16	13201947	13203982	2035	41	0	45	0	35	29	1|0	w	d	w	d	w	w	YES
16	19853052	19875086	22034	3	464	454	518	6	295	0|1	d	w	w	w	d	w	YES
16	19866866	19873589	6723	1	117	109	121	2	62	0|1	d	w	w	w	d	w	YES
16	25247610	25250629	3019	63	0	91	2	45	38	1|0	w	d	w	d	w	w	YES
16	55883859	55885654	1795	0	32	43	27	0	1	0|1	d	w	w	w	d	d	YES
16	56282855	56285334	2479	62	2	71	2	33	1	1|0	w	d	w	d	w	d	YES
16	61101835	61108164	6329	86	0	121	0	75	75	1|0	w	d	w	d	w	w	YES
16	83058933	83061623	2690	23	0	2	37	24	26	1|0	w	d	d	w	w	w	YES
17	193757	197095	3338	85	0	2	68	69	60	1|0	w	d	d	w	w	w	YES
17	5536431	5538228	1797	23	1	0	1	37	22	1|0	w	d	d	d	w	w	YES
17	14130635	14132282	1647	35	0	0	36	0	22	1|0	w	d	d	w	d	w	YES
17	18359521	18405808	46287	182	1	0	243	5	148	1|0	w	d	d	w	d	w	YES
17	32829748	32834459	4711	15	20	18	76	41	13	0|1	?	?	?	?	?	?	?
17	49207762	49215719	7957	1	131	167	145	72	1	0|1	d	w	w	w	w	d	YES
17	52444733	52447840	3107	0	23	44	53	14	0	0|1	d	w	w	w	w	d	YES
18	10212279	10213606	1327	0	16	12	24	13	0	0|1	d	w	w	w	w	d	YES
18	13133139	13134147	1008	0	22	15	28	11	0	0|1	d	w	w	w	w	d	YES
18	20244630	20246073	1443	15	0	0	9	19	10	1|0	?	?	?	?	?	?	?
18	36513897	36520754	6857	50	0	0	100	56	50	1|0	w	d	d	w	w	w	YES
18	37118883	37122157	3274	0	39	60	0	0	0	0|1	d	w	w	d	d	d	YES
18	43181630	43183130	1500	7	29	9	11	10	6	0|1	?	?	?	?	?	?	?
18	57823737	57825176	1439	23	1	6	33	25	29	1|0	w	d	d	w	w	w	YES
18	61874816	61883348	8532	3	113	153	190	107	1	0|1	d	w	w	w	w	d	YES
18	61917825	61920181	2356	26	0	3	46	28	14	1|0	w	d	d	w	w	w	YES
18	66534969	66538094	3125	37	0	0	0	1	33	1|0	w	d	d	d	d	w	YES
18	74763360	74767344	3984	90	8	74	13	58	63	1|0	w	d	w	d	w	w	YES
18	75158696	75159963	1267	28	1	26	4	24	16	1|0	w	d	w	d	w	w	YES
19	344559	346010	1451	8	37	6	19	18	4	0|1	?	?	?	?	?	?	?
19	11378418	11379619	1201	16	3	11	2	8	15	1|0	?	?	?	?	?	?	?
19	13636665	13637831	1166	0	26	16	25	0	0	0|1	d	w	w	w	d	d	YES
19	20387675	20509790	122115	1675	8	2442	23	1446	1329	1|0	w	d	w	d	w	w	YES
19	20430128	20444588	14460	98	0	184	5	118	103	1|0	w	d	w	d	w	w	YES
19	23256975	23258625	1650	14	2	23	1	10	12	1|0	w	d	w	d	w	w	YES
19	35979312	35981586	2274	0	47	0	69	33	1	0|1	d	w	d	w	w	d	YES
19	40352905	40357636	4731	66	0	108	0	63	68	1|0	w	d	w	d	w	w	YES
19	41532592	41538914	6322	1	45	76	74	54	0	0|1	d	w	w	w	w	d	YES
19	51006756	51008668	1912	1	20	17	26	25	1	0|1	d	w	w	w	w	d	YES
19	51314493	51320096	5603	80	5	90	6	65	59	1|0	w	d	w	d	w	w	YES
19	55769697	55774319	4622	0	73	105	74	61	2	0|1	d	w	w	w	w	d	YES
19	60162382	60163864	1482	0	20	20	18	15	0	0|1	d	w	w	w	w	d	YES
20	1337096	1338815	1719	0	43	60	2	1	39	0|1	d	w	w	d	d	w	YES
20	1508739	1541685	32946	7	566	702	759	7	7	0|1	d	w	w	w	d	d	YES
20	1537901	1541853	3952	0	100	108	116	0	0	0|1	d	w	w	w	d	d	YES
20	26040755	26042314	1559	27	5	10	29	27	30	1|0	?	?	?	?	?	?	?
20	26208600	26209802	1202	6	37	39	1	3	3	0|1	d	w	w	d	d	d	YES
20	30989190	30993067	3877	28	3	5	49	20	19	1|0	w	d	d	w	w	w	YES
20	41914702	41917189	2487	30	1	0	53	20	21	1|0	w	d	d	w	w	w	YES
20	52080407	52091437	11030	131	2	218	0	137	128	1|0	w	d	w	d	w	w	YES
20	55512587	55513972	1385	0	14	18	22	1	10	0|1	d	w	w	w	d	w	YES
21	13903225	13938400	35175	257	162	134	152	192	101	1|0	?	?	?	?	?	?	?
21	17534249	17535569	1320	39	0	0	0	33	31	1|0	w	d	d	d	w	w	YES
21	42223143	42226542	3399	62	0	0	52	35	53	1|0	w	d	d	w	w	w	YES
21	43794831	43797826	2995	61	2	2	70	69	1	1|0	w	d	d	w	w	d	YES
22	16150283	16159065	8782	108	1	4	106	2	76	1|0	w	d	d	w	d	w	YES
22	19280623	19283843	3220	0	35	39	50	0	1	0|1	d	w	w	w	d	d	YES
22	21808403	21809634	1231	16	1	2	25	0	19	1|0	w	d	d	w	d	w	YES
22	39124156	39125180	1024	7	2	21	2	21	17	1|0	?	?	?	?	?	?	?
X	12344155	12346746	2591	29	1	0	0	3	17	0|1	w	d	d	d	d	w	NO
X	34348297	34352929	4632	52	4	0	0	34	2	1|0	w	d	d	d	w	d	YES
X	58523560	58544299	20739	248	2	0	0	169	8	1|0	w	d	d	d	w	d	YES
X	67040547	67047024	6477	1	104	0	0	65	64	0|1	d	w	d	d	w	w	YES
X	77008016	77010544	2528	0	33	0	0	0	27	0|1	d	w	d	d	d	w	YES
X	80293742	80297735	3993	46	25	0	0	29	24	0|1	?	?	?	?	?	?	?
X	108239877	108244039	4162	53	2	0	0	36	1	1|0	w	d	d	d	w	d	YES
X	118757995	118760588	2593	7	25	0	0	0	23	0|1	d	w	d	d	d	w	YES
X	122778926	122780522	1596	29	1	0	0	28	1	1|0	w	d	d	d	w	d	YES
X	126425415	126430063	4648	34	0	0	0	50	2	1|0	w	d	d	d	w	d	YES
X	128328120	128330117	1997	1	48	0	0	35	44	0|1	d	w	d	d	w	w	YES
X	139330405	139331496	1091	31	20	0	0	18	16	0|1	?	?	?	?	?	?	?
X	149678444	149679454	1010	32	5	0	0	3	22	1|0	w	d	d	d	d	w	YES
