# Supplementary material for: Direct chromosome-length haplotyping by single-cell sequencing
Source: HighWire-hosted journal article supplement (doi:10.1101/gr.209841.116), 2016-09-19
Supplement: Supplemental_Table_S9.xlsx [file Supplemental_Table_S9.xlsx]

## Sheet: Sheet1
Supplemental Table S9. Coordinates of LOH events in single cells
Cell_ID	Start	End	Width	Chromosome	ID
NW150212-III_32_2	94351627	94354044	2417	chr1	NA12878
NW150212-IV_92_1	111907967	112118719	210752	chr1	NA12878
NW150212-IV_92_1	105186804	105252560	65756	chr10	NA12878
NW150212-III_59_1	28565188	28755421	190233	chr13	NA12878
NW130711_295_1	84393757	84427503	33746	chr16	NA12878
NW130711_302_2	869712	30982676	30112964	chr16	NA12878
NW130711_319_1	712843	34903552	34190709	chr16	NA12878
NW130711_334_1	47674912	88317399	40642487	chr16	NA12878
NW150212-IV_11_1	82856126	82883571	27445	chr16	NA12878
NW150212-III_18_1	71798799	71801692	2893	chr17	NA12878
NW150212-IV_92_2	73731801	73740225	8424	chr17	NA12878
NW130711_329_1	44057241	47120607	3063366	chr19	NA12878
NW150212-IV_46_1	46387029	46388119	1090	chr22	NA12878
NW150212-IV_92_2	113508566	134708646	21200080	chr3	NA12878
NW150212-IV_64_2	128236591	128249509	12918	chr7	NA12878
ML216_61_2	4675038	6169616	1494578	chr8	NA12878
NW150212-III_94_2	103617686	103637690	20004	chr8	NA12878
NW140626-IV_54_1	164281641	164364382	82741	chr1	NA12891
NW140626-III_84_1	55592679	55721389	128710	chr12	NA12891
NW140626-III_85_1	21397293	22139969	742676	chr13	NA12891
NW140626-II_50_1	62340486	62848878	508392	chr16	NA12891
NW140626-III_64_2	733578	3954343	3220765	chr17	NA12891
NW140626-III_77_1	43068325	43163256	94931	chr19	NA12891
NW140626-III_77_2	6461003	6766724	305721	chr19	NA12891
NW140626-IV_68_1	751562	836164	84602	chr2	NA12891
NW140626-II_50_2	102033340	102390779	357439	chr3	NA12891
NW140626-III_52_1	54926878	54971488	44610	chr3	NA12891
NW140626-III_26_1	139819285	139824824	5539	chr4	NA12891
NW140626-III_77_1	169722870	169740787	17917	chr5	NA12891
NW140626-III_26_2	113884957	113906546	21589	chr6	NA12891
NW140626-III_40_2	144916	149909	4993	chr6	NA12891
NW140626-III_49_1	106446052	106504441	58389	chr6	NA12891
NW140626-II_50_1	49495945	49537467	41522	chr7	NA12891
NW140626-III_72_1	3084327	3288870	204543	chr7	NA12891
NW140626-III_69_2	19172583	19401922	229339	chr8	NA12891
NW140626-III_85_1	90450382	90730592	280210	chr9	NA12891
NW150212-VII_33_2	156203977	240642953	84438976	chr1	NA12892
NW150212-VIII_94_2	107891952	146816402	38924450	chr1	NA12892
NW141029-I_63_1	80930825	82366675	1435850	chr16	NA12892
NW141029-III_22_1	51408641	84639658	3318797	chr16	NA12892
NW141029-III_69_2	49665535	85295963	35630428	chr16	NA12892
NW141029-IV_71_1	2952332	31254851	28302519	chr16	NA12892
NW141029-IV_90_1	64653242	80932983	16279741	chr16	NA12892
NW150212-VII_55_1	73328708	73623882	295174	chr18	NA12892
